# Supplementary material for: Operando XRD and electrogravimetry coupling to analyze species transfers during redox processes in Ni/Fe-layered double hydroxide
Source: Royal Society of Chemistry journal article supplement (doi:10.1039/d2ta07397h), 2022-01-01
Supplement: d2ta07397h1.pdf [file d2ta07397h1.pdf]

SUPPORTING INFORMATION

***Operando* XRD and electrogravimetry coupling to analyze species transfers during redox processes in Ni/Fe layered double hydroxide**

Elise Duquesne<sup>a,b</sup>, Stéphanie Bételu<sup>b\*</sup>, Alain Seron<sup>b</sup>, Damien Bricault<sup>a</sup>, Michel Goldmann<sup>c</sup>, Ioannis Ignatiadis<sup>b</sup>, Denis Limagne<sup>c</sup>, Alina Vlad<sup>d</sup>, Andrea Resta<sup>d</sup>, Hubert Perrot<sup>a</sup>, Ozlem Sel<sup>a</sup>, Catherine Debiehime-Chouvy<sup>a\*</sup>

a) Sorbonne Université, CNRS, Laboratoire Interfaces et Systèmes Electrochimiques, UMR 8235, LISE, 4 place Jussieu, F-75005 Paris, France

b) Bureau de Recherches Géologiques et Minières, 3 Avenue Claude Guillemin, F-45100 Orléans, France

c) Institut des NanoSciences de Paris, Sorbonne Université, CNRS, INSP, 4 place Jussieu, F-75005 Paris, France

d) Synchrotron SOLEIL, L'Orme des Merisiers, Saint-Aubin BP48, F-91192 Gif-Sur-Yvette, France

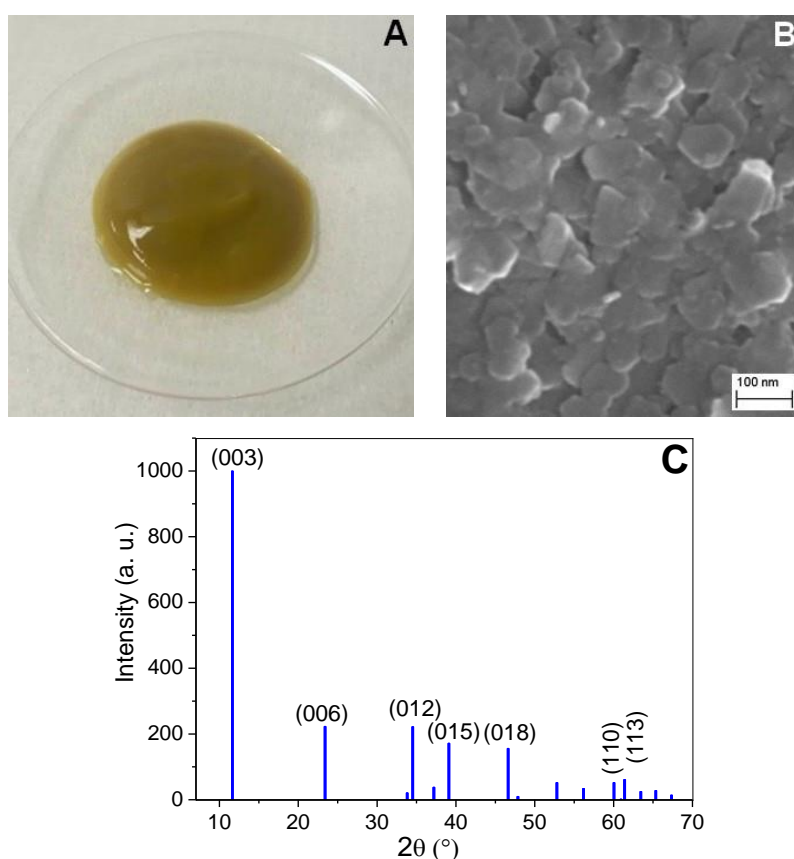

**Figure S1.** A) Photo of the Ni/Fe-LDH slurry. B) SEM micrograph of Ni/Fe-LDH platelets deposited on a substrate by drop-casting. C) XRD pattern of  $\text{Ni}_2\text{Fe}_6(\text{OH})_{16}(\text{CO}_3)(\text{H}_2\text{O})_{4.5}$ , data are from ICDD card n°01-082-8040.

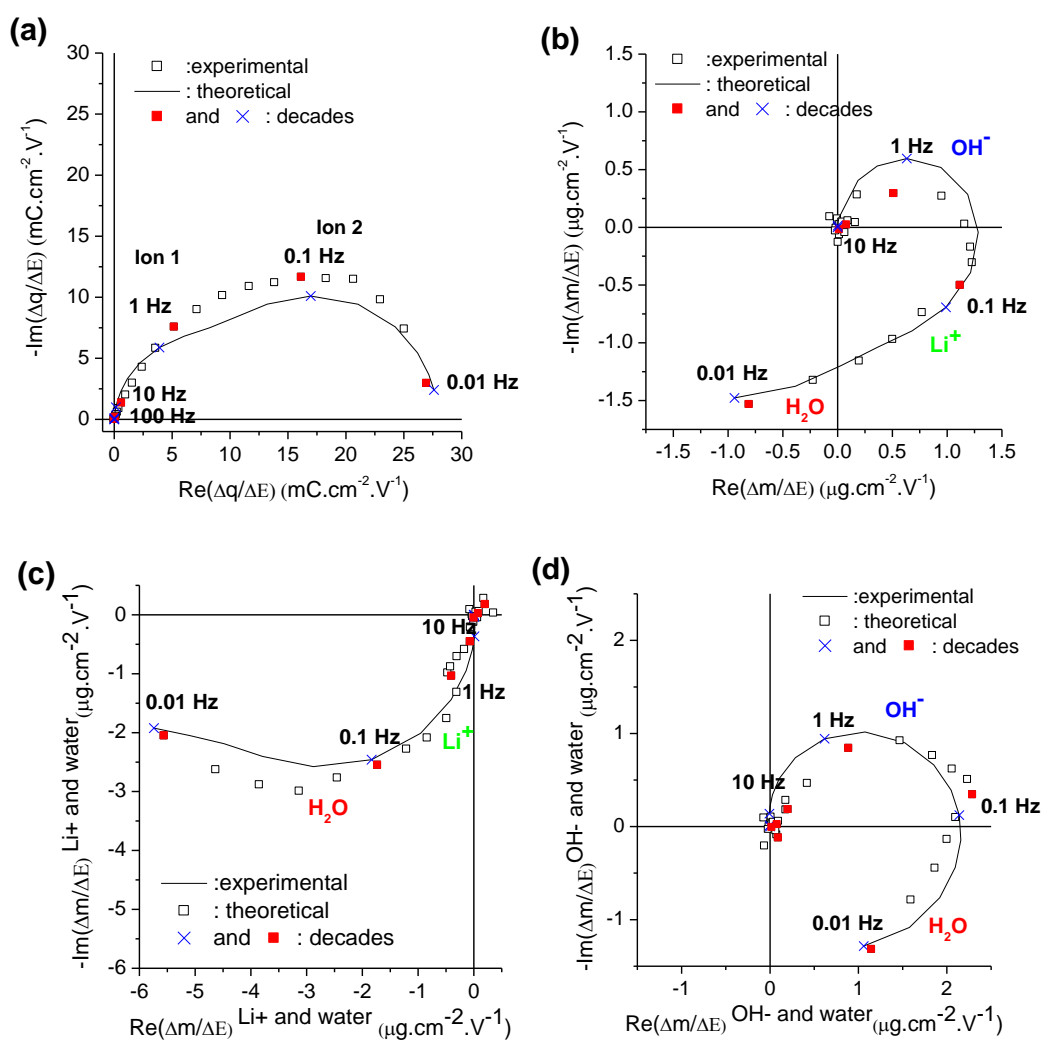

**Figure S2.** Fitting of the experimental data of a thin film of Ni/Fe-LDH immersed in 1 M LiOH at 0.65 V/SHE: (a)  $\Delta q/\Delta E$  TF, (b)  $\Delta m/\Delta E$  transfer function, (c)  $\Delta m/\Delta E$  ( $\text{Li}^+$  +  $\text{H}_2\text{O}$ ) partial transfer function (after removing the contribution of  $\text{OH}^-$ ), (d)  $\Delta m/\Delta E$  ( $\text{OH}^-$  +  $\text{H}_2\text{O}$ ) partial transfer function (after removing the contribution of  $\text{Li}^+$ ).

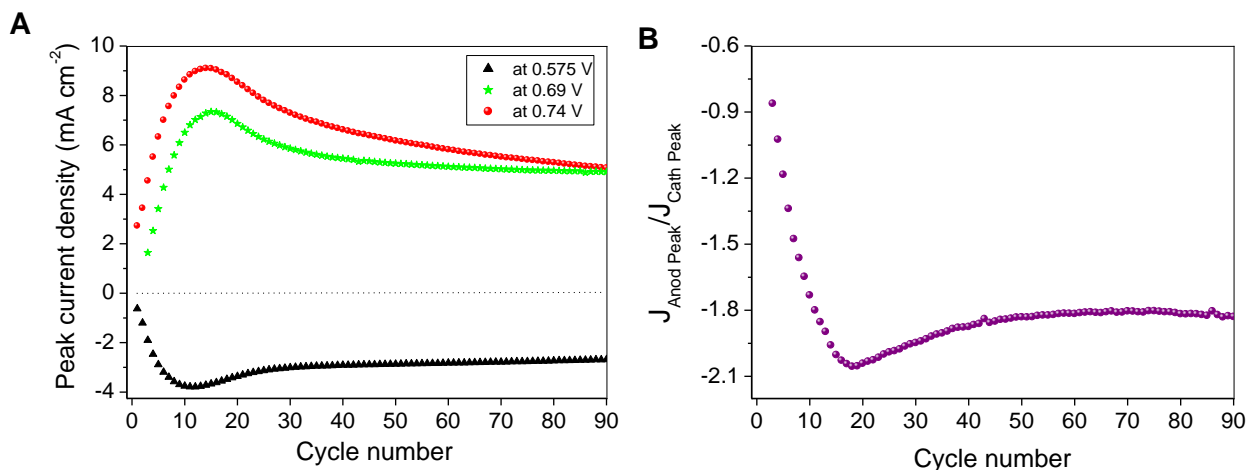

**Figure S3.** Ni/Fe-LDH in LiOH. (A) Peak current densities at each cycle: Ni(II) oxidation in green, Ni(III) reduction in black and anodic limit due to OER in red. (B) Ratio of the intensity of the Ni(II) oxidation peak over the intensity of the Ni(III) reduction peak vs. cycle number, in 1 M LiOH at  $10 \text{ mV}\cdot\text{s}^{-1}$  (data from Figure 4).
